# Supplementary material for: Adherence to multidisciplinary care in a prospective chronic kidney disease cohort is associated with better outcomes
Source: PubMed Central journal article supplement (PMC9565398; doi:10.1371/journal.pone.0266617), 2022-10-14
Supplement: pone.0266617.s002.pdf [file pone.0266617.s002.pdf]

**S2Table. Death risk.** Cox regression multivariate analysis, adjusted to sex, age, diabetes, smoking, obesity, cardiovascular comorbidities, CKD stages, initial systolic and diastolic blood pressure, proteinuria, RASB initial treatment and studied groups, in global and matched population.

| Death risk                                                        | Global population |                    |              | Matched population |                    |              |
|-------------------------------------------------------------------|-------------------|--------------------|--------------|--------------------|--------------------|--------------|
|                                                                   | HR                | CI 95%             | p            | HR                 | CI 95%             | p            |
| Sex [Reference Men]                                               | 0.746             | 0.701-0.794        | 0.000        | 0.754              | 0.691-0.823        | 0.000        |
| Age (year) [Continuous]                                           | 1.063             | 1.059-1.066        | 0.000        | 1.061              | 1.056-1.066        | 0.000        |
| Diabetes [Reference No]                                           | 1.301             | 1.223-1.394        | 0.000        | 1.279              | 1.173-1.395        | 0.000        |
| Systolic blood pressure (mmHg) [Continuous]                       | 1.001             | 1.000-1.003        | 0.131        | 1.001              | 0.998-1.004        | 0.521        |
| Diastolic blood pressure (mmHg)[Continuous]                       | 0.998             | 0.995-1.002        | 0.330        | 0.999              | 0.994-1.004        | 0.710        |
| Proteinuria (mg/day) [Reference <500 mg/day)]                     | 1.412             | 1.287-1.549        | 0.000        | 1.525              | 1.342-1.732        | 0.000        |
| Cardiovascular comorbidities [Reference No]                       | 1.443             | 1.358-1.533        | 0.000        | 1.439              | 1.321-1.567        | 0.000        |
| Smoking [Reference No]                                            | 1.354             | 1.210-1.515        | 0.000        | 1.306              | 1.115-1.529        | 0.001        |
| CKD stage I [Reference eGFR $\geq$ 90 ml/min/1.73m <sup>2</sup> ] |                   |                    | 0.000        |                    |                    | 0.000        |
| Stage II (FG 89,9 .45ml/min/1.73m <sup>2</sup> ) [Ref Stage 1]    | 1.103             | 0.854-1.425        | 0.454        | 1.033              | 0.767-1.392        | 0.830        |
| Stage III (FG 49,9-30 ml/min/1.73m <sup>2</sup> ) [Ref Stage 1]   | 1.424             | 1.123-1.806        | 0.004        | 1.367              | 1.037-1.802        | 0.027        |
| Stage IV (FG 29,9-15 ml/min/1.73m <sup>2</sup> ) [Ref Stage 1]    | 2.106             | 1.649-2.690        | 0.000        | 2.051              | 1.532-2.747        | 0.000        |
| Stage V (FG < 15 ml/min/1.73m <sup>2</sup> ) [Ref Stage 1]        | 2.679             | 2.003-3.585        | 0.000        | 2.145              | 1.438-3.202        | 0.000        |
| RASB [Reference No]                                               | 0.882             | 0.830-0.938        | 0.000        | 0.875              | 0.803-0.953        | 0.002        |
| <b>Nephrocare Group [Reference Non-adherent Group]</b>            | <b>0.671</b>      | <b>0.628-0.717</b> | <b>0.000</b> | <b>0.692</b>       | <b>0.637-0.753</b> | <b>0.000</b> |

CKD= Chronic kidney disease, RASB= Renin-angiotensin system blockade

**Supplementary Table S3.** Death and End stage kidney disease (ESKD) risk. Cox regression multivariate analysis, adjusted to sex, age, diabetes, smoking, CV comorbidities, CKD stages, initial systolic and diastolic blood pressure, proteinuria, RASB initial treatment and studied groups, in global and matched population.

| Death and ESRD (combined events) risk                              | Global population |                    |              | Matched population |                    |              |
|--------------------------------------------------------------------|-------------------|--------------------|--------------|--------------------|--------------------|--------------|
|                                                                    | HR                | CI 95%             | p            | HR                 | CI 95%             | p            |
| Sex [Reference Men]                                                | 0.758             | 0.718-0.801        | 0.000        | 0.769              | 0.709-0.833        | 0.000        |
| Age (year) [Continuous]                                            | 1.029             | 1.028-1.032        | 0.000        | 1.037              | 1.033-1.041        | 0.000        |
| Diabetes [Reference No]                                            | 1.304             | 1.235-1.377        | 0.000        | 1.303              | 1.203-1.411        | 0.000        |
| Systolic blood pressure (mmHg) [Continuous]                        | 1.003             | 1.002-1.005        | 0.000        | 1.002              | 1.000-1.005        | 0.102        |
| Diastolic blood pressure (mmHg) [Continuous]                       | 0.996             | 0.993-0.999        | 0.011        | 0.998              | 0.994-1.002        | 0.314        |
| Proteinuria (mg/day) [Reference <500 mg/day]                       | 1.929             | 1.798-2.070        | 0.000        | 1.865              | 1.676-2.075        | 0.000        |
| Cardiovascular comorbidities [Reference No]                        | 1.332             | 1.261-1.407        | 0.000        | 1.394              | 1.288-1.509        | 0.000        |
| Smoking [Reference No]                                             | 1.281             | 1.164-1.410        | 0.000        | 1.301              | 1.131-1.496        | 0.000        |
| CKD stages [Reference I=eGFR $\geq$ 90 ml/min/1.73m <sup>2</sup> ] |                   |                    | 0.000        |                    |                    | 0.000        |
| Stage II (FG 89.9-45 ml/min/1.73m <sup>2</sup> ) [Ref Stage 1]     | 1.454             | 1.160-1.822        | 0.001        | 1.326              | 1.005-1.749        | 0.046        |
| Stage III (FG 49.9-30 ml/min/1.73m <sup>2</sup> ) [Ref Stage 1]    | 2.495             | 2.027-3.071        | 0.000        | 2.122              | 1.641-2.744        | 0.000        |
| Stage IV (FG 29.9-15 ml/min/1.73m <sup>2</sup> ) [Ref Stage 1]     | 5.103             | 4.126-6.310        | 0.000        | 4.138              | 3.165-5.411        | 0.000        |
| Stage V (FG < 15 ml/min/1.73m <sup>2</sup> ) [Ref Stage 1]         | 8.021             | 6.340-10.149       | 0.000        | 5.927              | 4.301-8.168        | 0.000        |
| RASB [Reference No]                                                | 0.866             | 0.821-0.914        | 0.000        | 0.851              | 0.787-0.921        | 0.000        |
| <b>Nephrocare Group [Reference Non-adherent Group]</b>             | <b>0.777</b>      | <b>0.731-0.827</b> | <b>0.000</b> | <b>0.801</b>       | <b>0.742-0.865</b> | <b>0.000</b> |

CKD= Chronic kidney disease, RASB= Renin-angiotensin system blockade.
