# Supplementary material for: Adherence to multidisciplinary care in a prospective chronic kidney disease cohort is associated with better outcomes
Source: PubMed Central journal article supplement (PMC9565398; doi:10.1371/journal.pone.0266617), 2022-10-14
Supplement: pone.0266617.s004.pdf [file pone.0266617.s004.pdf]

**S4 Table. Planned kidney replacement treatment.** Logistic regression analysis, adjusted to sex, age, diabetes, cardiovascular comorbidities and estimated glomerular filtration at kidney replacement treatment start, in global and matched population.

| <b>Planned (vs urgent)* KRT start risk</b>             | <b>Global population</b> |                    |              | <b>Matched population</b> |                    |              |
|--------------------------------------------------------|--------------------------|--------------------|--------------|---------------------------|--------------------|--------------|
|                                                        | OR                       | CI 95%             | p            | OR                        | CI 95%             | p            |
| Sex [Reference Men]                                    | 1.182                    | 0.927-1.508        | 0.178        | 1.254                     | 0.801-1.964        | 0.323        |
| Age (year) [Continuous]                                | 0.997                    | 0.989-1.006        | 0.548        | 1.000                     | 0.984-1.017        | 0.958        |
| Diabetes [Reference No]                                | 0.534                    | 0.418-0.681        | 0.000        | 0.440                     | 0.281-0.691        | 0.000        |
| Cardiovascular comorbidities [Reference No]            | 0.810                    | 0.615-1.066        | 0.132        | 0.864                     | 0.529-1.411        | 0.558        |
| eGFR_KRT (ml/min/1.73m <sup>2</sup> ) [Continuous]     | 1.042                    | 1.019-1.065        | 0.000        | 1.029                     | 0.996-1.063        | 0.082        |
| <b>Nephrocare Group [Reference Non-adherent Group]</b> | <b>2.494</b>             | <b>1.591-3.910</b> | <b>0.000</b> | <b>2.191</b>              | <b>1.322-3.631</b> | <b>0.002</b> |

\* as stated by the attending nephrologist at chronic kidney replacement treatment (KRT) start in the official authorization form, eGFR\_KRT= estimated glomerular filtration rate at kidney replacement treatment start.

CKD= Chronic kidney disease, RASB= Renin-angiotensin system blockade.

| Death and ESRD (combined events) risk                              | Global population |                    |              | Matched population |                    |              |
|--------------------------------------------------------------------|-------------------|--------------------|--------------|--------------------|--------------------|--------------|
|                                                                    | HR                | CI 95%             | p            | HR                 | CI 95%             | p            |
| Sex [Reference Men]                                                | 0.758             | 0.718-0.801        | 0.000        | 0.769              | 0.709-0.833        | 0.000        |
| Age (year) [Continuous]                                            | 1.029             | 1.028-1.032        | 0.000        | 1.037              | 1.033-1.041        | 0.000        |
| Diabetes [Reference No]                                            | 1.304             | 1.235-1.377        | 0.000        | 1.303              | 1.203-1.411        | 0.000        |
| Systolic blood pressure (mmHg) [Continuous]                        | 1.003             | 1.002-1.005        | 0.000        | 1.002              | 1.000-1.005        | 0.102        |
| Diastolic blood pressure (mmHg) [Continuous]                       | 0.996             | 0.993-0.999        | 0.011        | 0.998              | 0.994-1.002        | 0.314        |
| Proteinuria (mg/day) [Reference <500 mg/day]                       | 1.929             | 1.798-2.070        | 0.000        | 1.865              | 1.676-2.075        | 0.000        |
| Cardiovascular comorbidities [Reference No]                        | 1.332             | 1.261-1.407        | 0.000        | 1.394              | 1.288-1.509        | 0.000        |
| Smoking [Reference No]                                             | 1.281             | 1.164-1.410        | 0.000        | 1.301              | 1.131-1.496        | 0.000        |
| CKD stages [Reference I=eGFR $\geq$ 90 ml/min/1.73m <sup>2</sup> ] |                   |                    | 0.000        |                    |                    | 0.000        |
| Stage II (FG 89.9-45 ml/min/1.73m <sup>2</sup> ) [Ref Stage 1]     | 1.454             | 1.160-1.822        | 0.001        | 1.326              | 1.005-1.749        | 0.046        |
| Stage III (FG 49.9-30 ml/min/1.73m <sup>2</sup> ) [Ref Stage 1]    | 2.495             | 2.027-3.071        | 0.000        | 2.122              | 1.641-2.744        | 0.000        |
| Stage IV (FG 29.9-15 ml/min/1.73m <sup>2</sup> ) [Ref Stage 1]     | 5.103             | 4.126-6.310        | 0.000        | 4.138              | 3.165-5.411        | 0.000        |
| Stage V (FG < 15 ml/min/1.73m <sup>2</sup> ) [Ref Stage 1]         | 8.021             | 6.340-10.149       | 0.000        | 5.927              | 4.301-8.168        | 0.000        |
| RASB [Reference No]                                                | 0.866             | 0.821-0.914        | 0.000        | 0.851              | 0.787-0.921        | 0.000        |
| <b>Nephrocare Group [Reference Non-adherent Group]</b>             | <b>0.777</b>      | <b>0.731-0.827</b> | <b>0.000</b> | <b>0.801</b>       | <b>0.742-0.865</b> | <b>0.000</b> |
